# Supplementary material
Source: bioRxiv or medRxiv preprint supplement (https://medrxiv.org/highwire/filestream/95903/field_highwire_adjunct_files/0/2020.09.06.20189191-1.pdf)

Supplementary Fig. 1 Kaplan-Meier curve for OS (A) and RFS (B) by another grouping strategy of MNSN. When MNSN was grouped into 0, 1, 2-4, 5-7, it had excellent discriminatory ability for OS, but not for RFS, suggesting that MNSN1 and MNSN2 should be classified into one group. (The p value in the graph indicates the significance of log-rank test compared with the upper group. MNSN: Metastatic Lymph Node Station Number)

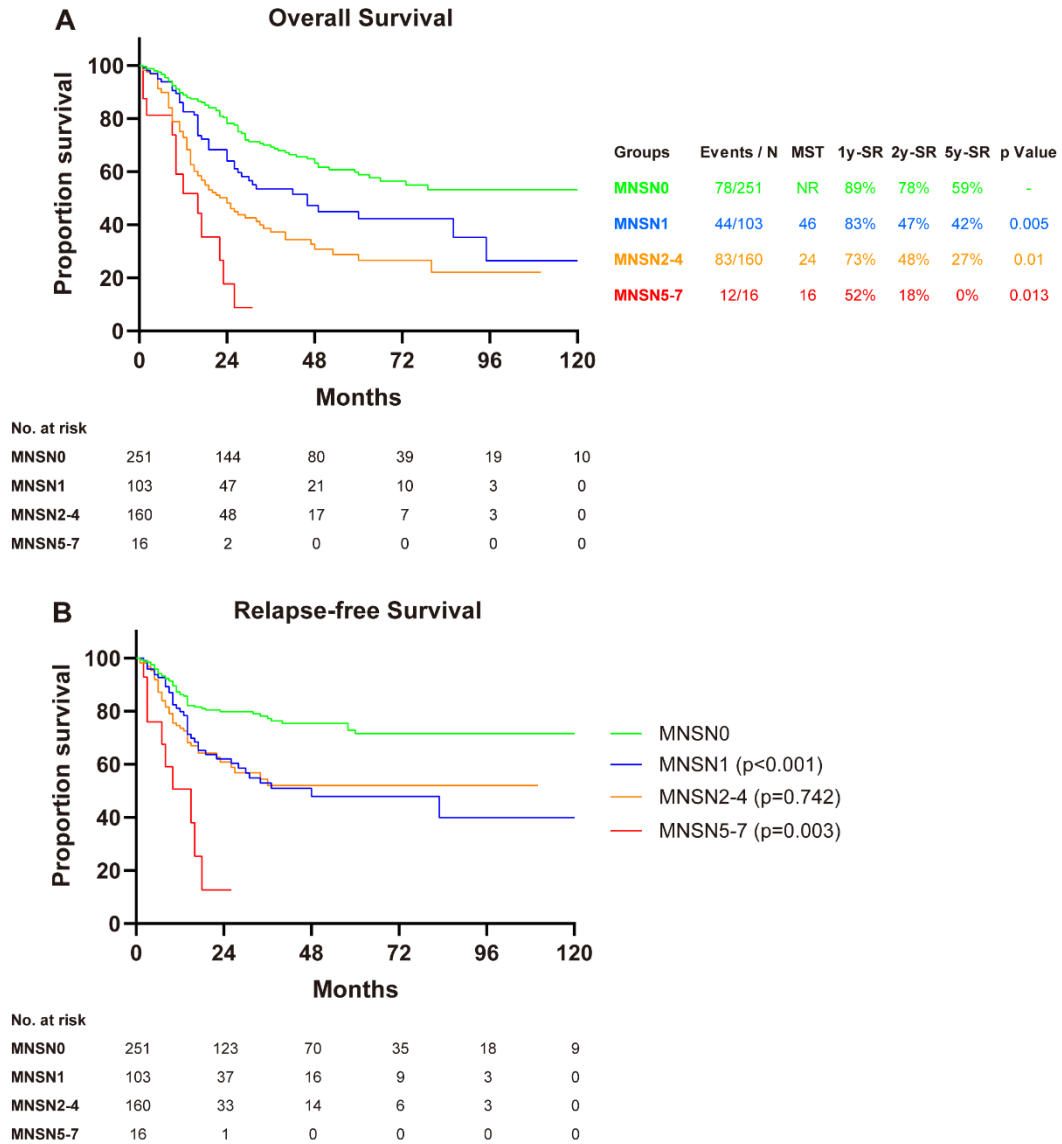

Supplement: Supplementary file [file 2020.09.06.20189191-1.pdf]
